# Major genetic components underlying alcoholism in Korean population

Dai-Jin Kim<sup>1,†</sup>, Ihn-Geun Choi<sup>2,†</sup>, Byung Lae Park<sup>3</sup>, Bounge-Chul Lee<sup>2</sup>, Byung-Joo Ham<sup>2</sup>, Sujung Yoon<sup>1</sup>, Joon Seol Bae<sup>3</sup>, Hyun Sub Cheong<sup>3</sup> and Hyoung Doo Shin<sup>3,\*</sup>

<sup>1</sup>Department of Psychiatry, Holy Family Hospital, College of Medicine, Catholic University of Korea, Sosa-dong, Wonmi-Gu, Pucheon, Kyonggi-do 420-717, Republic of Korea, <sup>2</sup>Department of Neuropsychiatry, Hallym University, Han-Gang Sacred Heart Hospital, 94-200 Youngdungpo-Dong, Youngdungpo-Gu, Seoul 150-719, Republic of Korea and <sup>3</sup>Department of Genetic Epidemiology, SNP Genetics, Inc., Rm 1407, 14th floor, Complex B, WooLim Lion's Valley, 371-28, Gasan-Dong, Geumcheon-Gu, Seoul 153-801, Republic of Korea

Received October 1, 2007; Revised and Accepted November 30, 2007

Alcohol metabolism is one of the biological determinants that could significantly be influenced by genetic polymorphisms in alcohol-metabolism genes. Alcohol dehydrogenase (ADH) converts alcohol to acetaldehyde, and aldehyde dehydrogenase (ALDH) converts acetaldehyde to acetate. The well-known genetic polymorphisms in *ADH1B*(His47Arg) and *ALDH2*(Glu487Lys) have dramatic effects on the rate of metabolizing alcohol and acetaldehyde, respectively. The protective allele of *ADH1B* (*ADH1B*\*47His) encodes for a rapid ethanol-metabolizing enzyme, and the susceptible allele of the *ALDH2* (*ALDH2*\*487Lys) is strongly associated with decreased rate of metabolizing acetaldehyde. However, the combined genetic effects of both functional polymorphisms have not been clarified. The combined analysis of two polymorphisms among a Korean population ( $n = 1,032$ ) revealed dramatic genetic effects on the risk of alcoholism. Individuals bearing susceptible alleles at both loci have 91 times greater risk for alcoholism [odds ratio (OR) = 91.43,  $P = 1.4 \times 10^{-32}$ ] and individuals bearing one susceptible and one protective allele at either loci have 11 times greater risk (OR = 11.40,  $P = 3.5 \times 10^{-15}$ ) compared with subjects who have both protective alleles. The attributable fraction of those genetic factors, calculated based on population controls, indicates that alcoholism in 86.5% of alcoholic patients can be attributed to the detrimental effect of *ADH1B*\*47Arg and/or *ALDH2*\*487Glu in Korean population.

## INTRODUCTION

Alcohol metabolism occurs in two major steps: oxidation of alcohol to acetaldehyde by the alcohol dehydrogenases (ADHs) enzymes, especially by *ADH1B*, and further oxidation of acetaldehyde into acetate by aldehyde dehydrogenase enzymes (ALDHs), mainly by *ALDH2*. Encoding genes for these two representative alcohol-metabolizing enzymes display polymorphisms (*ADH1B* His47Arg and *ALDH2* Glu487Lys) that show different alcohol/acetaldehyde oxidizing capability among individuals (1–4). The *ADH1B*\*47His allele represents a much higher activity of *ADH1B* with ~40 times higher  $V_{max}$  than the homozygotes for the *ADH1B*\*47Arg form, which enables increased alcohol elimination from the blood after alcohol consumption (1,5). The

*ALDH2*\*487Lys allele encodes a catalytically inactive subunit (1,5), which causes alcohol-related adverse reactions including flushing, palpitation, nausea, headache, drowsiness, breathlessness and general discomfort (6). These adverse reactions in subjects with *ALDH2*\*487Lys, as a result of excessive acetaldehyde accumulation, tend to reduce alcohol consumption, subsequently reducing the risk of alcoholism.

Many previous studies have reported genetic associations of *ADH1B* His47Arg and *ALDH2* Glu487Lys with alcoholism, especially in Asian populations (7–12). However, the combined genetic effects of these two loci have not yet been clarified. In the current study, the combined genetic effects of *ADH1B* and *ALDH2* genotypes were analyzed in a Korean population ( $n = 1032$ ).

\*To whom correspondence should be addressed. Tel: +82 220264288; Fax: +82 220264299; Email: hdshin@snp-genetics.com

†The authors wish it to be known that, in their opinion, the first two authors should be regarded as joint First Authors.

**Table 1.** Analysis of genetic effect of *ADH1B* His47Arg and *ALDH2*Glu487Lys on the risk of alcoholism among Korean male subjects ( $n = 1032$ )

| Loci                      | Genotype | Alcoholism, $n$ (%) | HWE <sup>a</sup>       | NC, $n$ (%) | HWE <sup>a</sup> | OR (95% CI) <sup>b</sup> | $P$ -value <sup>b</sup> | OR (95% CI) <sup>c</sup> | $P$ -value <sup>c</sup> | Genetic effect |
|---------------------------|----------|---------------------|------------------------|-------------|------------------|--------------------------|-------------------------|--------------------------|-------------------------|----------------|
| <i>ADH1B</i><br>His47Arg  | His/His  | 217 (39.5)          |                        | 298 (61.7)  |                  | 1                        | –                       | 1                        | –                       | Protective     |
|                           | His/Arg  | 145 (26.4)          | $3.17 \times 10^{-28}$ | 155 (32.1)  | 0.110            | 1.29 (0.97–1.71)         | 0.09                    |                          |                         | Protective     |
|                           | Arg/Arg  | 187 (34.1)          |                        | 30 (6.2)    |                  | 8.56 (5.61–13.07)        | $2.8 \times 10^{-23}$   | 7.80 (5.18–11.75)        | $8.2 \times 10^{-23}$   | Susceptible    |
| <i>ALDH2</i><br>Glu487Lys | Glu/Glu  | 530 (96.5)          |                        | 346 (73.6)  |                  | 1                        | –                       | 1                        | –                       | Susceptible    |
|                           | Glu/Lys  | 19 (3.5)            | 0.680                  | 122 (25.3)  | 0.297            | 0.10 (0.06–0.17)         | $4.5 \times 10^{-19}$   | 0.10 (0.06–0.15)         | $3.6 \times 10^{-21}$   | Protective     |
|                           | Lys/Lys  | 0 (0.0)             |                        | 15 (3.1)    |                  | –                        | –                       | –                        | –                       | Protective     |

<sup>a</sup> $P$ -value of genotype distribution deviation from Hardy–Weinberg equilibrium.

<sup>b</sup>Logistic regression models were used for calculating ORs (95% CI) and corresponding  $P$ -values. The common alleles were used as the referent genotype to the heterozygote and homozygote of the minor allele.

<sup>c</sup>OR and  $P$ -value of referent analysis between susceptible versus protective genotype groups.

## RESULTS

In the Korean population, the *ADH1B* His47Arg polymorphism showed, as expected, a dramatic genetic association with the risk of alcoholism. Referent analysis of *ADH1B* His47Arg revealed that its genetic mode for the risk of alcoholism is apparently susceptible and recessive, when comparing the strength and magnitude of associations of heterozygotes and homozygotes for *ADH1B*\*47Arg. Only 6.2% of normal controls had the *ADH1B*\*47Arg/Arg genotype, compared with 34.1% in alcoholics [recessive mode; odds ratio (OR) = 7.80 95% confidential interval (CI), 5.18–11.75,  $P = 8.2 \times 10^{-23}$ ]. In addition, the genotype distribution of *ADH1B* His47Arg showed severe deviation from Hardy–Weinberg equilibrium (HWE) ( $P = 3.17 \times 10^{-28}$ ) in alcoholics, whereas no deviation was detected among normal controls. The deviation from HWE occurring only in alcoholics strongly suggests that a selection bias (or pressure) is involved, which would be additional direct evidence of association of this polymorphism with the risk of alcoholism (Table 1).

The *ALDH2*Glu487Lys also showed apparent genetic effects on the risk of alcoholism [dominant mode; OR = 0.10 (95% CI, 0.06–0.15) and  $P = 3.6 \times 10^{-21}$ ]. In contrast to *ADH1B*\*47Arg, the genetic mode of *ALDH2*\*487Lys clearly appeared to be protective and dominant in the referent analysis. Interestingly, subjects bearing *ALDH2*\*487Lys/Lys appeared to have complete genetic protection against alcoholism (no homozygotes in alcoholics) (Table 1).

Next, in order to examine whether these two functional polymorphisms have any interaction effects on the risk of alcoholism, subgroup analysis according to genetic effects of each loci was performed. The results were that similar magnitudes of genetic effects with those of all subjects were shown for the two polymorphisms (Supplementary Materials, Table S1), suggesting clearly independent genetic effects on the risk of alcoholism.

To examine the combined genetic effect of *ADH1B* His47Arg and *ALDH2* Glu487Lys, subjects were subdivided by genetic effects of both loci. Combined analysis revealed huge genetic effects on the risk of alcoholism, e.g. individuals bearing susceptible alleles at both loci were found to have 91 times greater risk for alcoholism (OR = 91.43,  $P = 1.4 \times 10^{-32}$ ) and individuals bearing one susceptible and one protective allele at either

loci had 11 times greater risk (OR = 11.40,  $P = 3.5 \times 10^{-15}$ ) compared with subjects who have both protective alleles (Table 2). The results of this combined analysis are concordant with those of the separated analysis (independent effects; Supplementary Materials, Table S1) and clearly showed additive effects on the risk of alcoholism development.

The attributable fraction (AF) was calculated by OR (10.53) and frequency (subjects with one or two susceptible alleles for either loci; 75.2%) based on population controls (Table 2). AF indicates that alcoholism in 86.5% of alcoholic patients in the Korean population can be attributed to the detrimental effects of *ADH1B*\*47Arg and/or *ALDH2*\*487Glu.

## DISCUSSION

Alcoholism [MIM# 103780] is a leading cause of morbidity and premature death. Several lines of evidence suggest a substantial genetic component to the risk for alcoholism. Alcoholism is believed to be a multifactorial and polygenic disorder involving complex gene-to-gene and gene-to-environment interactions. According to the National Council of Alcoholism and Drug Dependence (NCADD) and the American Society of Addiction Medicine (ASAM), 'alcoholism is a primary, chronic disease with genetic, psychosocial and environmental factors influencing its development and manifestations. The disease is often progressive and fatal. It is characterized by continuous or periodic impaired control over drinking, preoccupation with the drug alcohol, use of alcohol despite adverse consequences and distortion in thinking, most notably denial'.

In this study, by analyzing the well-known genetic polymorphisms in *ADH1B*(His47Arg) and *ALDH2*(Glu487Lys) in a large Korean sample ( $n = 1032$ ), we were able to show that the combined effect of the two alleles has a huge impact on disease phenotype. The employment of the large sample gives the study a great statistical power, and the evidences from this study might be, therefore, indisputable. In terms of combined analysis of two functional polymorphisms, <5% of people in the Korean population (disease and population controls) have susceptible/susceptible genotypes. In addition, although considerable allele frequency variation occurs even among East Asian populations, up to 25% of Asians have protective genotypes at both loci, whereas very

Table 2. Combined analysis of association of ADH1B His47Arg and ALDH2 Glu487Lys with the risk of alcoholism in Korean male subjects (n = 1032)

| Genotype<br>ADH1B His47Arg          | ALDH2<br>Glu487Lys                  | No. of subjects<br>Alcoholism, n (%) | NC, n (%)  | PC <sup>c</sup> , n (%) | OR (95% CI) <sup>a</sup> | P-value <sup>a</sup>  | OR (95% CI) <sup>b</sup> | P-value <sup>b</sup>  | OR (95% CI) <sup>c</sup> | P-value <sup>c</sup>  | P-value <sup>d</sup>  |
|-------------------------------------|-------------------------------------|--------------------------------------|------------|-------------------------|--------------------------|-----------------------|--------------------------|-----------------------|--------------------------|-----------------------|-----------------------|
| Protective (His/<br>His or His/Arg) | Protective (Glu/<br>Lys or Lys/Lys) | 12 (2.2)                             | 128 (26.5) | 95 (24.8)               | 1                        | –                     | 1                        | –                     | 1                        | –                     | –                     |
| Protective (His/<br>His or His/Arg) | Susceptible<br>(Glu/Glu)            | 350 (63.7)                           | 325 (67.3) | 263 (68.5)              | 11.49<br>(6.24–21.16)    | $4.7 \times 10^{-15}$ | 11.40 (6.19–<br>20.99)   | $3.5 \times 10^{-15}$ | 16.14 (8.80–<br>29.60)   | $2.6 \times 10^{-19}$ | $2.2 \times 10^{-31}$ |
| Susceptible<br>(Arg/Arg)            | Protective (Glu/<br>Lys or Lys/Lys) | 7 (1.3)                              | 9 (1.9)    | 9 (2.3)                 | 8.30<br>(2.62–26.24)     | 0.0003                | 91.43 (43.42–<br>192.50) | $1.4 \times 10^{-32}$ | 91.43 (43.42–<br>192.50) | $1.4 \times 10^{-32}$ | –                     |
| Susceptible<br>(Arg/Arg)            | Susceptible<br>(Glu/Glu)            | 180 (33.8)                           | 21 (4.3)   | 17 (4.4)                | 91.43 (43.42–<br>192.50) | $1.4 \times 10^{-32}$ | 91.43 (43.42–<br>192.50) | $1.4 \times 10^{-32}$ | 91.43 (43.42–<br>192.50) | $1.4 \times 10^{-32}$ | –                     |

<sup>a</sup>OR and P-value for referent analysis of protective/protective genotype group.

<sup>b</sup>OR and P-value of genotype groups with one and two copy of susceptible alleles versus protective/protective genotype group.

<sup>c</sup>OR and P-value of genotype groups with one or two copies of susceptible allele versus protective/protective genotype group.

<sup>d</sup>Global P-value.

<sup>e</sup>Population controls (n = 384). Population controls were used for attributable fraction (AF, 87.7%) calculation [OR (10.53) and frequency (75.2%) of PC] of subjects with one or two susceptible alleles for either loci

low numbers of European or African populations have been reported to have these protective genotypes (13,14). The much higher frequencies of the protective ADH1B and ALDH2 alleles (ADH1B\*47His and ALDH2\*487Lys) in some Asian populations, therefore, clearly provide some East Asians, especially Koreans and Japanese (6), with protection against alcoholism, compared with most European or African populations who have susceptible alleles (ADH1B\*47Arg and ALDH2\*487Glu).

Interestingly, the genotype distribution of both ADH1B and ALDH2 differs greatly between Asian, especially East Asian, and other major populations. Recently, the global frequencies of ADH1B\*47His have been well-defined. The frequency of the ADH1B\*47His allele is particularly high in East/West Asian populations and moderate in southeast Asian and North African populations, but the allele is almost absent in sub-Saharan African, European and Native American populations (13,15). Similarly, ALDH2\*487Lys has only been detected among East Asian populations (14). Although other social/cultural factors might be involved, these different genetic backgrounds regarding alcohol metabolism could very likely explain the lower incidence of alcohol abuse in some East Asian populations, including the Korean population (16).

Several plausible evidences for natural selection of this allele in Koreans, Japanese and Han Chinese have been suggested (13,17). The researchers proposed interesting hypotheses that might explain the high frequencies of ADH1B\*47His and ALDH2\*487Lys in East Asian populations. Among them, the hypothesis of selection pressure for higher ADH1B (mediated by ADH1B\*47His) and lower ALDH2 (mediated by ALDH2\*487Lys), against some endemic disease(s), including parasitism, in area with high frequencies of those alleles, might be the most plausible explanation, although the nature of the selective pressure and the time period during which it operates are still unknown. Interestingly, Li *et al.* (13) presented very convincing evidence that the distribution of ADH1B\*47His increased in frequency independently in West and East Asia after humans had spread across Eurasia. Similarly, natural selection of ALDH2\*487Lys in East Asian populations was also suggested (14).

In summary, we re-confirmed that the well-known ADH1B His47Arg and ALDH2 Glu487Lys have the dramatic genetic associations with the risk of alcoholism, and that their genetic effects are clearly independent among Korean population. When combined together, those two loci revealed huge genetic effects on the risk of alcoholism. In addition, AF indicates that alcoholism in 87.7% of alcoholic patients in the Korean population can be attributed to the detrimental effect of ADH1B\*47Arg and/or ALDH2\*487Glu, which suggesting that the two polymorphisms are major genetic components for alcoholism, at least, in Korean population.

MATERIALS AND METHODS

Study subjects and genotyping of polymorphisms

The patients used in this study (n = 549, all males; mean age = 46.1, range = 20–73), all of whom were



alcohol-dependent according to the *Diagnostic and Statistical Manual of Mental Disorders IV* (DSM-IV) criteria (American Psychiatric Association, 1994), were recruited from Hangang Sacred Heart Hospital, Yong-In Mental Hospital, Hanmaum Hospital, Gumin Hospital, Hando Hospital (Hanllym University groups) and another network of multicenter mental hospitals in Korea (Holy Family Hospital, Chamsarang Mental Hospital, Chunchon Mental Hospital; Catholic University groups). The patients had neither major medical nor co-morbid psychiatric illnesses other than alcohol-related disorders and/or nicotine dependence (43%). The controls were unrelated healthy male employees of Hangang Sacred Heart Hospital ( $n = 483$ , all male; mean age = 33.2 years, range = 20–77). Most of the participating employees were non-drinkers; only some were occasional light drinkers, as revealed by a drinking habit questionnaire. Subjects who had first-degree relatives with major psychiatric disorders, such as schizophrenia, mood disorders or substance-use disorders other than nicotine dependence, were excluded. Additional population controls ( $n = 384$ , all males) were used for AF calculation. The Institutional Review Board of each hospital approved the study, and informed consents were obtained.

The *ADH1B* His47Arg and *ALDH2* Glu487Lys polymorphisms were genotyped using the TaqMan method (18), which has been described in our previous work (9,19).

### Statistics

$\chi^2$  tests were used to determine if the individual variants were in HWE. Logistic regression analyses, controlling for age as covariate, were used to calculate ORs and the *P*-values for case–control analysis. The AF was calculated by the formula  $AF = f(R - 1)/(1 + f(R - 1))$ , where *f* is the frequency of the risk factor in the population and *R* is the measure of the OR (20). In combined analysis (Table 2), several facts were considered when choosing a method of analysis, including (i) the two SNPs were not linked to each other, (ii) no significant interactions were detected through interaction analysis ( $P > 0.36$ , data not shown) and (iii) both SNPs have obvious effects and their genetic modes are apparent [susceptible/recessive (*ADH1B*\*47Arg) and protective/dominant (*ALDH2*\*487Lys) in this study of a Korean population]. Based on these considerations, we have adopted one of the simplest methods of analysis, e.g. susceptible versus protective at two loci (four subgroups). The protective/protective subgroup was used as the referent to the other subgroups. Logistic regression analyses, controlling for age as covariate, were used to calculate ORs and the *P*-values for case–control analysis. All statistical analyses were performed using SAS 9.1 (SAS Institute, Inc., Cary, NC, USA).

### SUPPLEMENTARY MATERIAL

Supplementary Material is available at HMG Online.

*Conflict of Interest statement.* None declared.

### FUNDING

This work was supported by a grant from the National Research Lab Program as part of the National Research and Development Program of the Ministry of Commerce, Industry and Energy of Korea (M1-0302-00-0073). This study was also partly supported by a grant from Biomedical Brain Research Center (A040042) and a grant of the Korea Health 21 R&D Project, Ministry of Health & Welfare (03-PJ10-PG13-GD01-0002) funded by the Ministry of Health & Welfare, Republic of Korea.

### REFERENCES

- Bosron, W.F. and Li, T.K. (1986) Genetic polymorphism of human liver alcohol and aldehyde dehydrogenases, and their relationship to alcohol metabolism and alcoholism. *Hepatology*, **6**, 502–510.
- Yokoyama, A., Muramatsu, T., Omori, T., Yokoyama, T., Matsushita, S., Higuchi, S., Maruyama, K. and Ishii, H. (2001) Alcohol and aldehyde dehydrogenase gene polymorphisms and oropharyngolaryngeal, esophageal and stomach cancers in Japanese alcoholics. *Carcinogenesis*, **22**, 433–439.
- Marchand, L.L., Wilkinson, G.R. and Wilkens, L.R. (1999) Genetic and dietary predictors of CYP2E1 activity: a phenotyping study in Hawaii Japanese using chlorzoxazone. *Cancer Epidemiol. Biomarkers Prev.*, **8**, 495–500.
- Crabb, D.W., Edenberg, H.J., Bosron, W.F. and Li, T.K. (1989) Genotypes for aldehyde dehydrogenase deficiency and alcohol sensitivity. The inactive *ALDH2*(2) allele is dominant. *J. Clin. Invest.*, **83**, 314–316.
- Yoshida, A., Hsu, L.C. and Yasunami, M. (1991) Genetics of human alcohol-metabolizing enzymes. *Prog. Nucleic Acid Res. Mol. Biol.*, **40**, 255–287.
- Matsuo, K., Wakai, K., Hirose, K., Ito, H., Saito, T. and Tajima, K. (2006) Alcohol dehydrogenase 2 His47Arg polymorphism influences drinking habit independently of aldehyde dehydrogenase 2 Glu487Lys polymorphism: analysis of 2,299 Japanese subjects. *Cancer Epidemiol. Biomarkers Prev.*, **15**, 1009–1013.
- Chen, C.C., Lu, R.B., Chen, Y.C., Wang, M.F., Chang, Y.C., Li, T.K. and Yin, S.J. (1999) Interaction between the functional polymorphisms of the alcohol-metabolism genes in protection against alcoholism. *Am. J. Hum. Genet.*, **65**, 795–807.
- Chen, W.J., Loh, E.W., Hsu, Y.P., Chen, C.C., Yu, J.M. and Cheng, A.T. (1996) Alcohol-metabolising genes and alcoholism among Taiwanese Han men: independent effect of *ADH2*, *ADH3* and *ALDH2*. *Br. J. Psychiatry*, **168**, 762–767.
- Choi, I.G., Son, H.G., Yang, B.H., Kim, S.H., Lee, J.S., Chai, Y.G., Son, B.K., Kee, B.S., Park, B.L., Kim, L.H. *et al.* (2005) Scanning of genetic effects of alcohol metabolism gene (*ADH1B* and *ADH1C*) polymorphisms on the risk of alcoholism. *Hum. Mutat.*, **26**, 224–234.
- Higuchi, S. (1994) Polymorphisms of ethanol metabolizing enzyme genes and alcoholism. *Alcohol Alcohol Suppl.*, **2**, 29–34.
- Whitfield, J.B. (2002) Alcohol dehydrogenase and alcohol dependence: variation in genotype-associated risk between populations. *Am. J. Hum. Genet.*, **71**, 1247–1250. author reply 1250–1241.
- Maezawa, Y., Yamauchi, M., Toda, G., Suzuki, H. and Sakurai, S. (1995) Alcohol-metabolizing enzyme polymorphisms and alcoholism in Japan. *Alcohol Clin. Exp. Res.*, **19**, 951–954.
- Li, H., Mukherjee, N., Soundararajan, U., Tarnok, Z., Barta, C., Khaliq, S., Mohyuddin, A., Kajuna, S.L., Mehdi, S.Q., Kidd, J.R. *et al.* (2007) Geographically separate increases in the frequency of the derived *ADH1B*\*47His allele in eastern and western Asia. *Am. J. Hum. Genet.*, **81**, 842–846.
- Oota, H., Pakstis, A.J., Bonne-Tamir, B., Goldman, D., Grigorenko, E., Kajuna, S.L., Karoma, N.J., Kungulilo, S., Lu, R.B., Odunsi, K. *et al.* (2004) The evolution and population genetics of the *ALDH2* locus: random genetic drift, selection, and low levels of recombination. *Ann. Hum. Genet.*, **68**, 93–109.
- Osier, M.V., Pakstis, A.J., Soodyall, H., Comas, D., Goldman, D., Odunsi, A., Okonofua, F., Parnas, J., Schulz, L.O., Bertranpetit, J. *et al.* (2002) A

- global perspective on genetic variation at the ADH genes reveals unusual patterns of linkage disequilibrium and diversity. *Am. J. Hum. Genet.*, **71**, 84–99.
16. Grant, B.F., Dawson, D.A., Stinson, F.S., Chou, S.P., Dufour, M.C. and Pickering, R.P. (2004) The 12-month prevalence and trends in DSM-IV alcohol abuse and dependence: United States, 1991–1992 and 2001–2002. *Drug Alcohol Depend.*, **74**, 223–234.
  17. Han, Y., Gu, S., Oota, H., Osier, M.V., Pakstis, A.J., Speed, W.C., Kidd, J.R. and Kidd, K.K. (2007) Evidence of positive selection on a class I ADH locus. *Am. J. Hum. Genet.*, **80**, 441–456.
  18. Livak, K.J. (1999) Allelic discrimination using fluorogenic probes and the 5' nuclease assay. *Genet. Anal.*, **14**, 143–149.
  19. Kim, D.J., Park, B.L., Yoon, S., Lee, H.K., Joe, K.H., Cheon, Y.H., Gwon, D.H., Cho, S.N., Lee, H.W., NamGung, S. *et al.* (2007) 5'-UTR polymorphism of dopamine receptor D1 (DRD1) associated with severity and temperament of alcoholism. *Biochem. Biophys. Res. Commun.*, **357**, 1135–1141.
  20. Adams, M.J., Jr., Khoury, M.J. and James, L.M. (1989) The use of attributable fraction in the design and interpretation of epidemiologic studies. *J. Clin. Epidemiol.*, **42**, 659–662.
